# Supplementary material
Source: PubMed Central journal article supplement (PMC6934991)
Supplement: ASN.2019050538SupplementaryData.pdf [file ASN.2019050538SupplementaryData.pdf]

## Supplemental Section for

**Detection of PLA2R Autoantibodies Before the Diagnosis of Membranous Nephropathy**  
**Peter D. Burbelo, Megha Joshi, Adrija Chaturvedi, Dustin Little, John Thurlow,**  
**Meryl Waldman, and Stephen W. Olson**

### Table of Contents

|                       |                                                                                                                  |   |
|-----------------------|------------------------------------------------------------------------------------------------------------------|---|
| Supplemental Figure 1 | Flow chart for selection of the primary and secondary MN cases.....                                              | 2 |
| Supplemental Figure 2 | Representative MN cases showing seropositive PLA2R-AB after<br>negative NNRP and then showing positive NNRP..... | 3 |
| Supplemental Figure 3 | One MN case showing seropositive PLA2R-AB prior to NNRP.....                                                     | 4 |
| Supplemental Figure 4 | Representative MN cases showing seropositive PLA2R-AB prior to hypoalbuminemia.....                              | 5 |

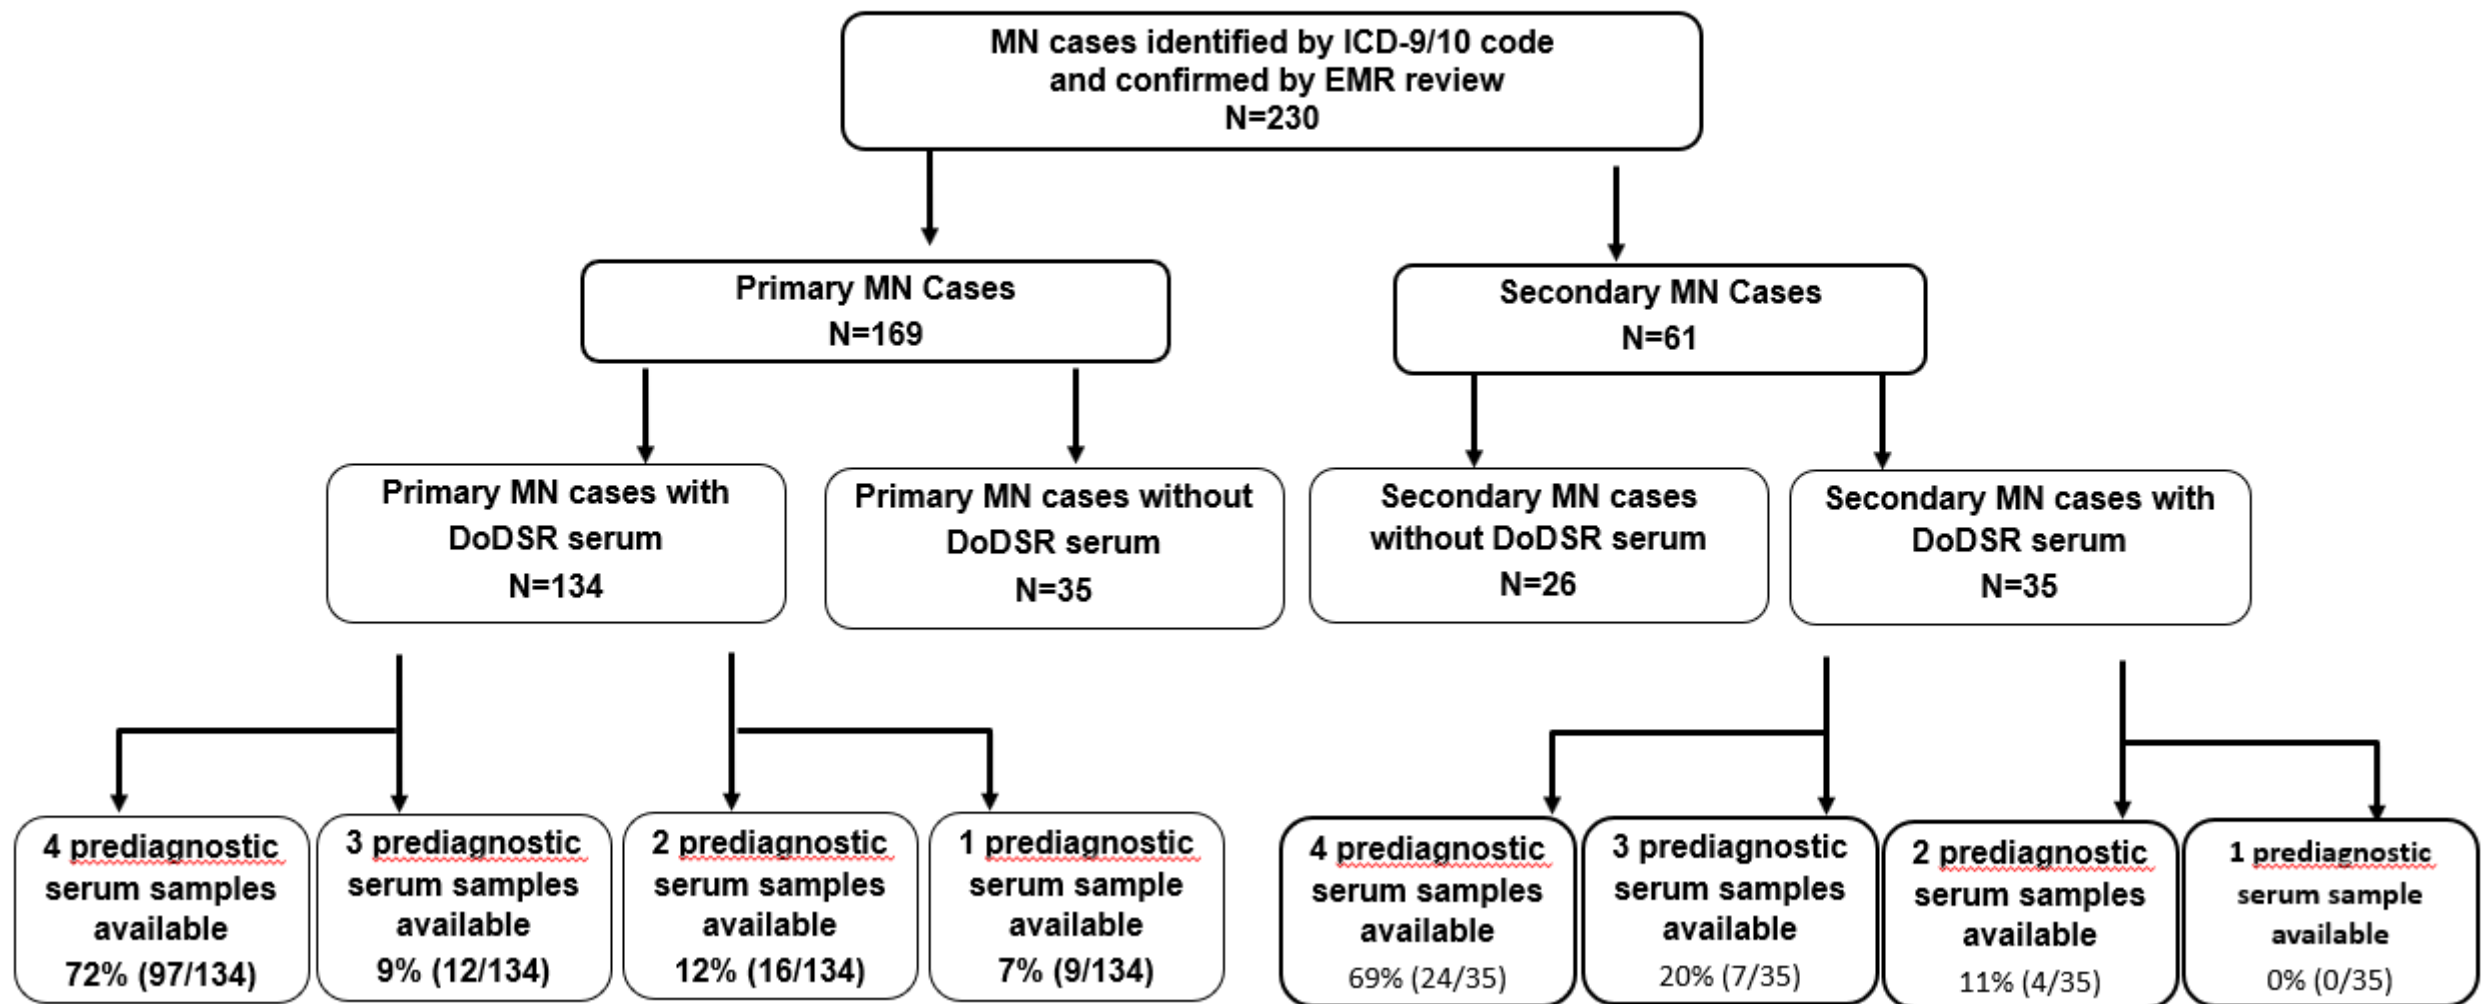

**Supplemental Figure 1. Flow chart for selection of the primary and secondary MN cases.** As described in the Material and Methods, screening of the military medical records serum albumin levels for primary and secondary MN cases was initially performed. Following comprehensive review and availability of serum samples, 169 cases of primary MN and 35 cases were identified. The number of available serum samples from these subjects is shown.

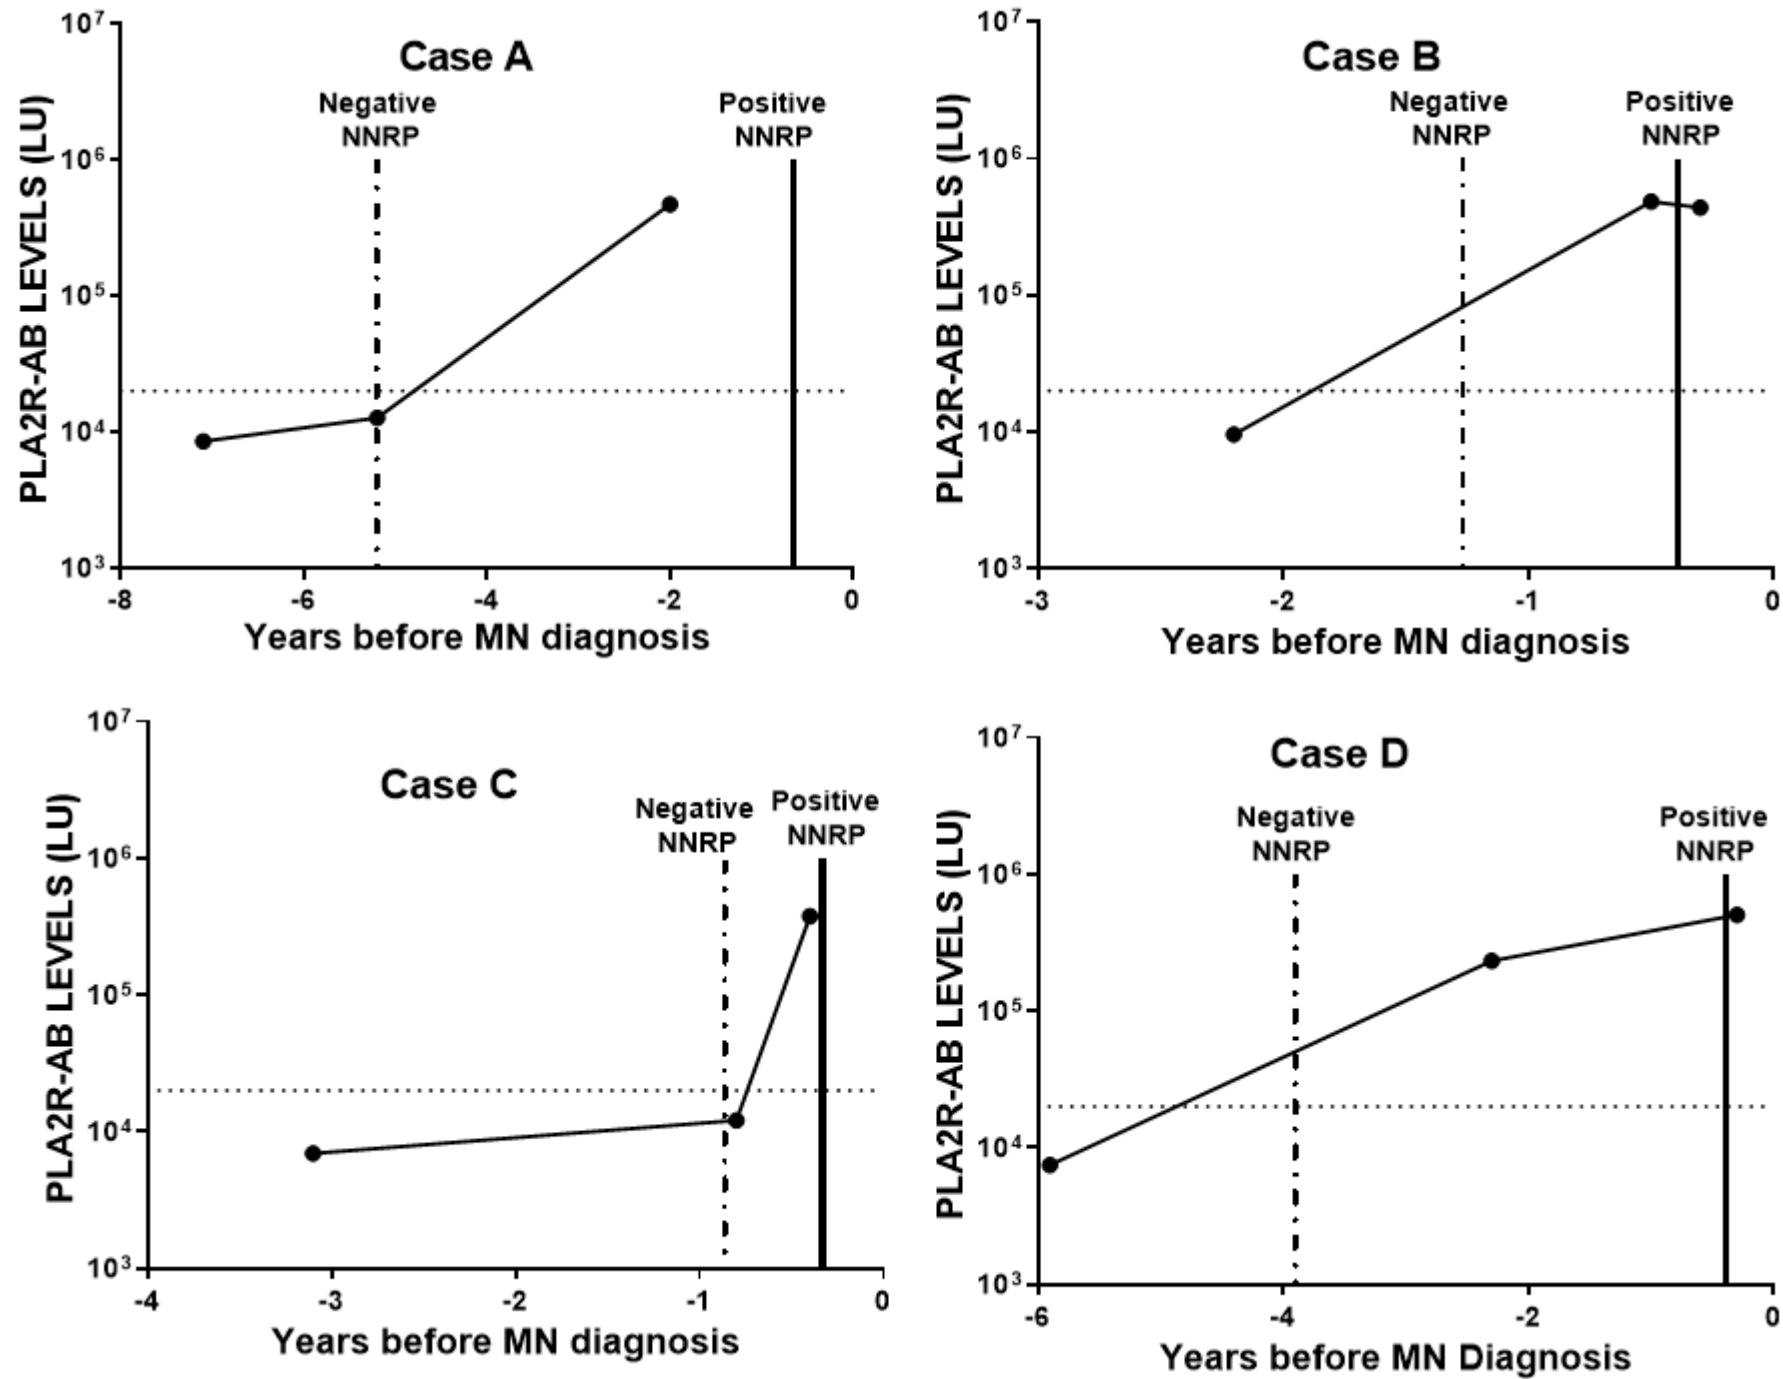

**Supplemental Figure 2. Representative MN cases showing seropositive PLA2R-AB after negative NNRP and then showing positive NNRP.** The left Y axis represents the scale of the PLA2R-AB levels in LU determined by LIPS and the black horizontal dotted line is the cut-off for determining PLA2R-AB seropositivity. The dotted vertical line denotes the negative prediagnostic NNRP, and the solid line vertical represents positive NNRP.

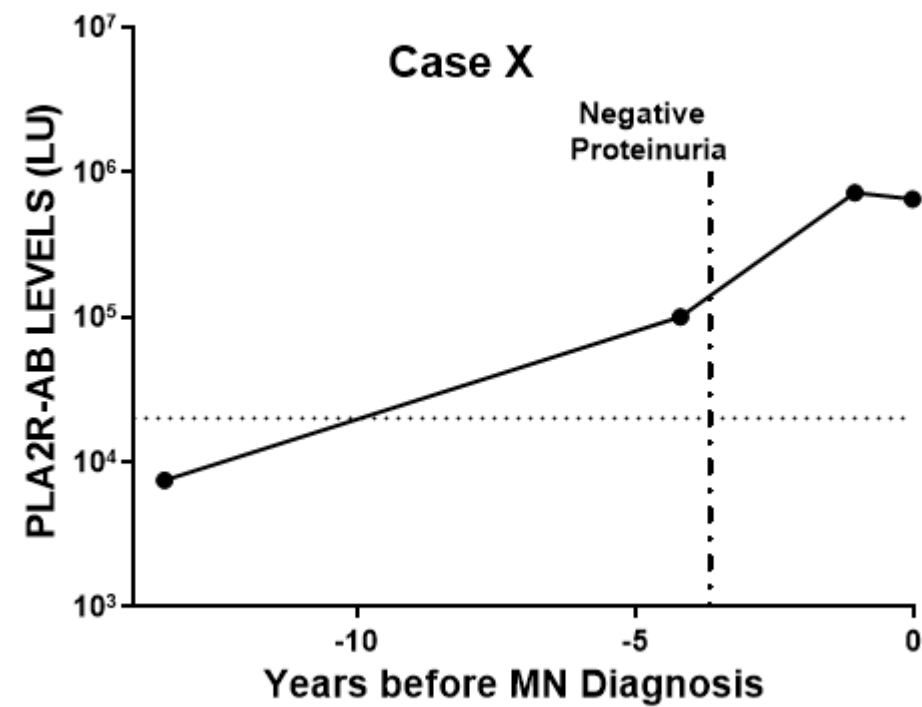

**Supplemental Figure 3. One MN case showing seropositive PLA2R-AB prior to NNRP.** The left Y axis represents the scale of the PLA2R-AB levels in LU determined by LIPS and the values are plotted in blue. The horizontal dotted line is the cut-off for determining PLA2R-AB seropositivity. Documentation of the prediagnostic NNRP is shown by the thick black dotted vertical line.

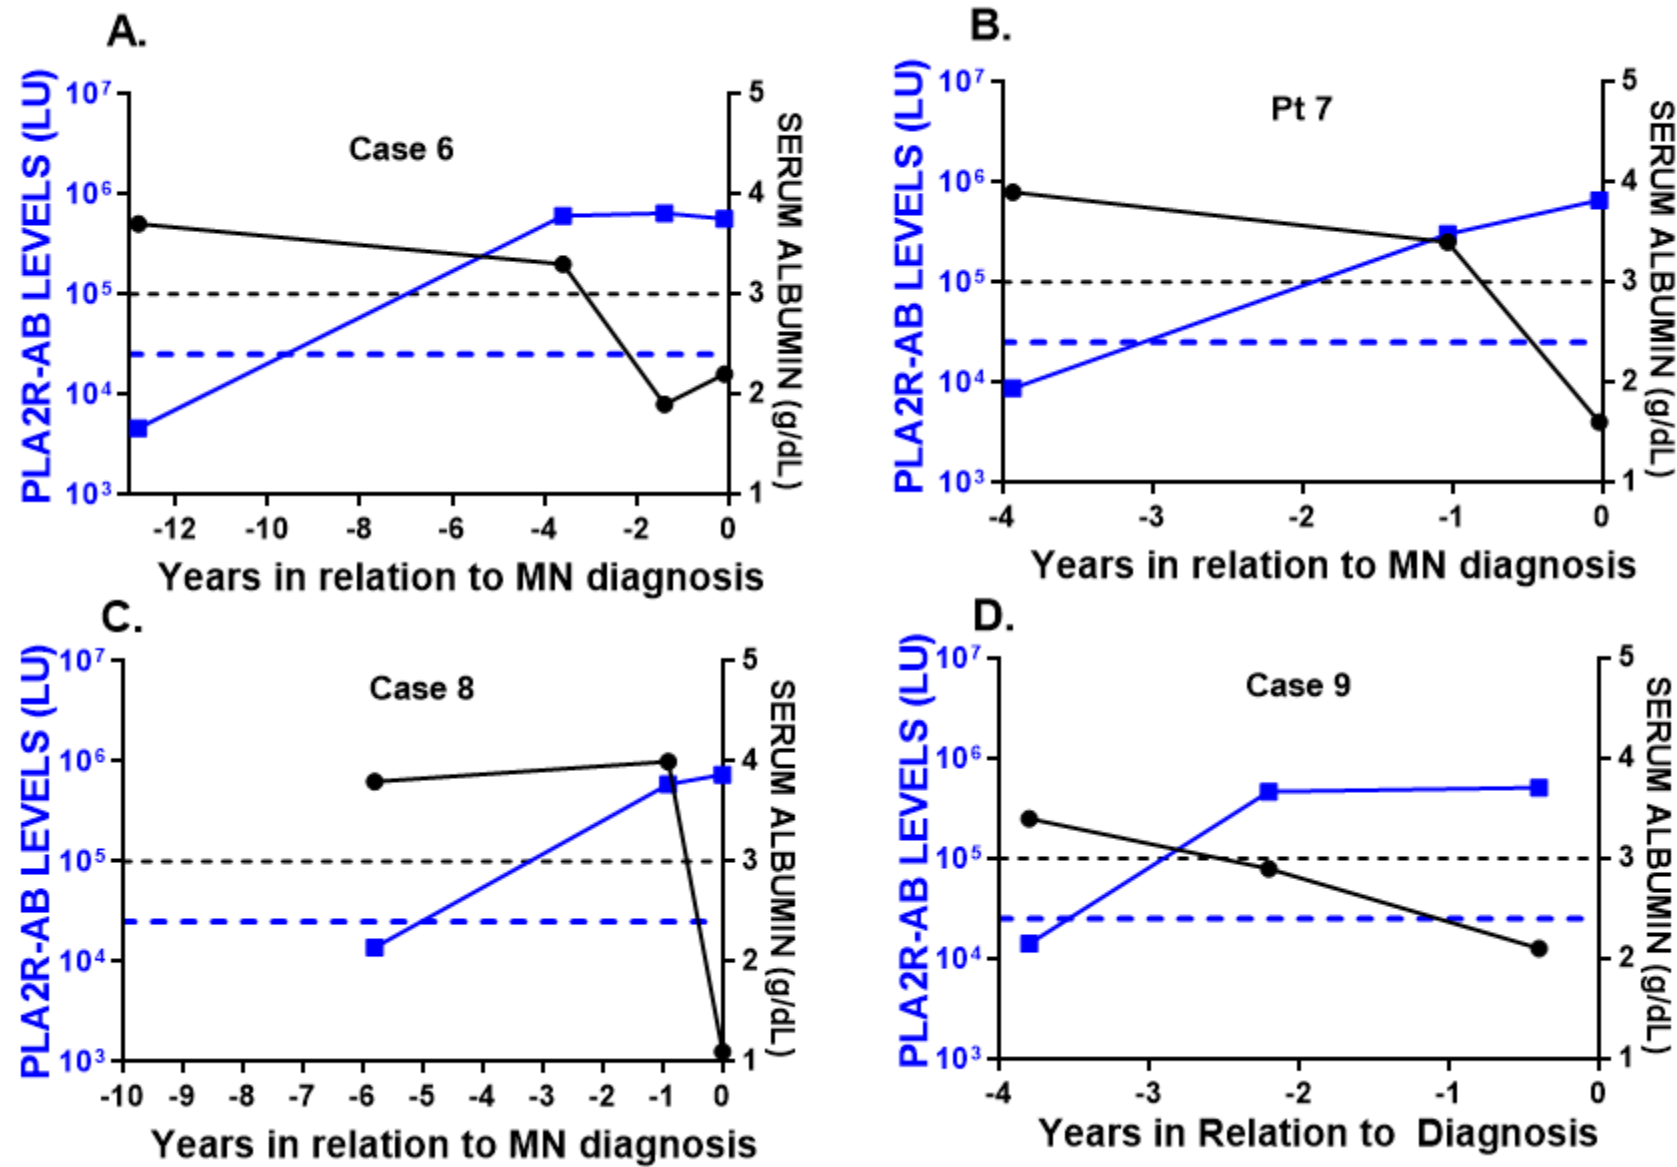

**Supplemental Figure 4. Representative MN cases showing seropositive PLA2R-AB prior to hypoalbuminemia.** The left Y axis represents the scale of the PLA2R-AB levels in LU determined by LIPS and the values are plotted in blue. The blue, horizontal dotted line is the cut-off for determining PLA2R-AB seropositivity. The right Y-axis denotes the serum albumin levels, and the cut-off value for determining hypoalbuminemia is shown by the black dotted line.
